# Supplementary material for: Performance of Four Sarcopenia Screening Tools for Possible Sarcopenic Obesity in Hospitalised Patients
Source: Research Square preprint supplement (doi:10.21203/rs.3.rs-8587167/v1), 2026-02-23
Supplement: Supplementary file 1 [file ece88869c1b564654ccdd4bb.xlsx]

## Sheet: Sheet1
Number	Sex	Age	Height	Weight	BMI	CC	GS	SARC-F	SARC-CalF	Ishii Score	SARC-F + EBM
1	woman	64	1.58	55	22.0317	30	15	9	19	136.07	9
2	man	68	1.7	60	20.7612	32	24.5	0	10	127.675	10
3	man	62	1.68	45	15.9439	30	27	2	12	125.51	12
4	man	62	1.7	50	17.301	27	19	5	15	164.15	15
5	woman	64	1.6	53	20.7031	28	21.1	0	0	111.581	10
6	woman	68	1.6	60	23.4375	31	15.6	0	0	132.936	0
7	man	83	1.65	62	22.7732	30	20.7	2	12	157.997	12
8	man	73	1.62	71	27.0538	34	18.6	2	12	139.726	2
9	woman	64	1.53	52	22.2137	33	11.9	0	0	142.009	0
10	man	65	1.72	50	16.901	28	25	0	10	142.83	10
11	man	74	1.68	75	26.5731	23	21	0	10	183.97	0
12	man	76	1.66	60	21.7738	33	28	0	10	117.18	10
13	man	65	1.74	66	21.7994	34	38	0	10	74.82	0
14	woman	66	1.64	64	23.7954	31	12.9	3	3	145.079	3
15	man	69	1.58	60	24.0346	32	22.5	0	10	134.475	0
16	woman	72	1.55	62	25.8065	29	22.4	0	0	108.084	0
17	man	68	1.8	63	19.4444	31	32.7	0	10	106.977	10
18	woman	66	1.56	54	22.1893	29.5	13.1	0	0	148.981	0
19	man	61	1.73	70	23.3887	31	20.3	2	12	140.953	2
20	man	69	1.55	44	18.3143	26.5	8.7	1	11	202.637	11
21	man	62	1.6	56	21.875	33	26.3	0	10	113.753	0
22	woman	62	1.62	68	25.9107	40	15.6	2	2	98.616	2
23	man	67	1.85	83	24.2513	36	24	3	3	110.04	3
24	man	67	1.69	65	22.7583	33	18.2	0	10	141.882	0
25	man	72	1.63	55	20.7008	34	28.5	3	13	108.515	13
26	man	66	1.75	78	25.4694	35.5	24.5	1	1	110.195	1
27	woman	62	1.54	46	19.3962	29	20.4	1	1	110.264	11
28	man	70	1.62	70	26.6728	34	19.9	4	14	133.849	4
29	man	74	1.75	86	28.0816	32	27	2	12	123.67	2
30	woman	74	1.65	62	22.7732	30.5	9.8	7	7	168.898	7
31	woman	66	1.55	63.5	26.4308	35.5	8.3	0	0	153.733	0
32	woman	70	1.67	60	21.5139	35	10	0	0	149.92	0
33	woman	70	1.5	60	26.6667	39	11.5	2	2	129.165	2
34	man	79	1.73	60	20.0474	33	10.5	8	18	173.115	28
35	woman	72	1.6	56	21.875	28	16	2	2	143.94	2
36	man	70	1.75	60	19.5918	30	20.6	4	14	150.246	14
37	man	80	1.75	54	17.6327	28	19	2	12	170.67	22
38	man	60	1.7	72	24.9135	36	37.1	1	1	65.221	1
39	woman	68	1.65	120	44.0771	34	18	0	0	110.88	0
40	man	80	1.7	60	20.7612	31	25.9	0	10	135.429	20
41	man	62	1.73	63.2	21.1166	33.5	31.2	0	10	96.292	0
42	man	71	1.7	70	24.2215	36	29.5	0	0	95.525	0
43	man	68	1.6	44	17.1875	29	18.2	1	11	161.062	11
44	woman	60	1.55	43	17.898	28	17.2	4	4	128.232	14
45	woman	69	1.7	68	23.5294	34	19.3	0	0	105.063	0
46	woman	71	1.64	58	21.5645	34	11	0	0	148.91	0
47	man	62	1.73	76	25.3934	41	23.7	0	0	84.667	0
48	woman	73	1.57	45	18.2563	28	13	3	3	160.01	13
49	man	75	1.68	55	19.487	27	16.7	2	12	179.317	22
50	woman	65	1.5	62.9	27.9556	32.6	26.5	0	0	69.807	0
51	man	72	1.72	71	23.9995	23.5	24.6	0	10	169.286	0
52	man	64	1.75	75.2	24.5551	33.4	33.2	1	11	91.816	1
53	man	73	1.7	73	25.2595	36	25.1	0	0	110.361	0
54	man	72	1.73	79	26.3958	40	24.8	0	0	92.108	0
55	woman	61	1.57	45	18.2563	31	12.5	0	0	143.115	10
56	man	74	1.67	57	20.4382	32	22	0	0	101.88	10
57	woman	75	1.6	67	26.1719	32.5	13.9	0	0	142.269	10
58	man	75	1.7	60	20.7612	28.5	17.7	1	11	169.267	21
59	woman	67	1.54	50	21.0828	29	15.3	0	0	140.223	0
60	woman	71	1.6	65	25.3906	35	17	2	2	115.09	2
61	woman	74	1.65	59	21.6713	30	13.1	1	1	153.741	1
62	man	72	1.76	63	20.3383	12	78.7	0	10	55.477	10
63	woman	83	1.6	60	23.4375	31	15.1	5	5	147.481	15
64	man	64	1.63	55	20.7008	29.5	31.2	0	10	116.092	10
65	man	69	1.68	61	21.6128	36	25.6	2	2	106.336	2
66	man	73	1.65	66	24.2424	34.6	16.6	2	2	143.122	2
67	man	80	1.6	64	25	35	19.6	0	0	136.336	10
68	man	72	1.72	75	25.3515	35	32	1	1	93.06	1
69	woman	60	1.6	57	22.2656	30	5.7	6	6	180.207	6
70	woman	69	1.62	45	17.1468	27	13	3	3	160.09	13
71	woman	80	1.56	56	23.0112	33	39.2	3	3	15.852	13
72	man	71	1.7	55	19.0311	27	25	4	14	151.19	14
73	man	62	1.65	68	24.977	33	45	0	10	55.97	0
74	woman	67	1.52	62	26.8352	36	16	2	2	113.7	2
75	man	77	1.72	65	21.9713	32	17.8	0	10	153.958	10
76	woman	62	1.65	70	25.7117	33	17	0	0	114.45	0
77	woman	69	1.57	41.5	16.8364	27.5	14.6	3	3	150.306	13
78	woman	75	1.6	59	23.0469	31	17	1	1	131.41	11
79	woman	65	1.6	69.5	27.1484	29	39	0	0	17.99	0
80	woman	70	1.6	55	21.4844	29	15.9	1	1	139.569	1
81	woman	69	1.63	62	23.3355	35	9.4	2	2	152.174	2
82	man	61	1.85	83	24.2513	39	24.3	0	0	91.473	0
83	man	62	1.74	67	22.1297	32.5	34.2	0	10	91.662	0
84	woman	77	1.55	79	32.8824	37	14.5	0	0	126.055	10
85	woman	80	1.57	42	17.0392	29	7.5	7	7	190.325	27
86	woman	63	1.65	57	20.9366	33	14.3	1	1	128.993	11
87	woman	61	1.58	61	24.4352	36	15.6	0	0	110.936	0
88	man	70	1.7	87	30.1038	32	17	0	10	152.09	0
89	woman	82	1.55	30	12.487	19	5.5	8	8	234.905	28
90	woman	63	1.5	70	31.1111	37	11.4	7	7	130.634	7
91	man	67	1.67	72	25.8166	36	10.4	4	4	152.064	4
92	woman	66	1.5	56.2	24.9778	33.4	17.4	1	1	114.302	1
93	man	67	1.64	56	20.8209	32	25.6	0	10	123.656	10
94	man	74	1.7	70	24.2215	31	34	3	13	106.68	3
95	woman	71	1.65	66	24.2424	32	22.7	3	3	95.917	3
96	man	62	1.75	85	27.7551	38	22.3	0	0	102.913	0
97	man	78	1.65	63	23.1405	28	11.2	7	17	193.532	17
98	woman	68	1.5	44	19.5556	26.5	8.7	4	4	182.817	14
99	woman	64	1.58	60	24.0346	33	17.8	0	0	111.978	0
100	man	66	1.68	71	25.1559	34	25.8	0	10	113.138	0
101	man	74	1.62	61	23.2434	29	15.8	3	13	172.198	3
102	man	64	1.65	65	23.8751	36	20.4	1	1	119.304	1
103	woman	79	1.5	53	23.5556	31	8.3	5	5	178.893	15
104	woman	66	1.58	64	25.6369	35	11.3	0	0	140.103	0
105	woman	69	1.55	65	27.0552	31	7.6	4	4	174.456	4
106	woman	75	1.63	60	22.5827	32	13.4	2	2	146.454	12
107	woman	80	1.55	63	26.2227	31.5	21	4	4	113.41	14
108	woman	80	1.62	59	22.4813	28.5	15.1	1	1	153.281	11
109	woman	74	1.57	62	25.1532	29.5	5.2	4	4	195.592	4
110	man	66	1.7	70	24.2215	18	67.2	0	10	59.452	0
111	man	70	1.6	52.5	20.5078	32	21.1	0	10	139.421	10
112	woman	67	1.5	56	24.8889	33	6.6	0	0	171.386	0
113	woman	78	1.6	70	27.3437	33.5	3.4	8	8	194.834	18
114	man	85	1.65	60	22.0386	31	11.8	0	10	182.098	10
115	man	61	1.77	76	24.2587	33	44	0	10	58.44	0
116	man	76	1.65	55	20.202	30.5	40	0	10	91.7	20
117	man	63	1.68	52	18.424	34	24.5	0	10	115.295	10
118	man	74	1.65	60	22.0386	32	25.1	0	10	129.541	0
119	man	77	1.72	80	27.0416	37	25.2	4	4	107.892	14
120	man	71	1.66	62	22.4996	32	20.5	3	13	141.895	3
121	man	70	1.65	52.5	19.2837	28	25.3	5	15	145.003	15
122	woman	65	1.6	55	21.4844	32	11.4	0	0	148.634	0
123	man	67	1.64	60	22.3081	31	30.1	0	10	114.391	0
124	man	72	1.65	48	17.6309	31.5	30.1	0	10	115.171	10
125	woman	93	1.5	60	26.6667	27	5.4	5	5	217.974	15
126	woman	72	1.58	69.5	27.8401	38	13.1	2	2	125.901	2
127	woman	62	1.58	62	24.8358	32	17.3	0	0	116.203	0
128	woman	61	1.6	53.5	20.8984	29	10.7	0	0	158.837	10
129	man	68	1.67	58	20.7967	32	27	2	12	119.95	12
130	man	64	1.78	75	23.6713	32	28.9	0	10	111.599	0
131	man	65	1.73	61	20.3816	32	32.1	1	11	102.331	11
132	man	65	1.72	59	19.9432	32.5	23.3	0	10	127.203	10
133	woman	66	1.58	56	22.4323	30	20	0	0	112.22	0
134	woman	61	1.61	66	25.462	30	15.3	1	1	132.143	1
135	man	64	1.74	87.5	28.9008	30	21.3	0	10	144.363	0
136	man	82	1.6	70	27.3437	38	11.7	0	0	148.067	10
137	man	62	1.6	60	23.4375	27	0	8	18	222.86	8
138	woman	71	1.6	65	25.3906	32	14.7	5	5	136.637	5
139	man	76	1.72	90	30.4218	34	23	4	14	127.99	14
140	woman	66	1.65	65	23.8751	33	26	0	0	71.84	0
141	woman	69	1.6	85	33.2031	33.5	11.6	4	4	145.896	4
142	woman	78	1.55	52	21.6441	32	16	1	1	135.62	11
143	man	68	1.76	62	20.0155	32.5	26.2	0	10	120.102	10
144	man	68	1.8	88.5	27.3148	39	24.8	2	2	94.268	2
145	man	67	1.6	50	19.5312	30	19.3	0	10	152.403	10
146	man	84	1.7	59	20.4152	29	25	3	13	149.97	23
147	man	67	1.65	78	28.6501	39	24.2	5	5	95.502	5
148	woman	77	1.51	42	18.4202	29	11.5	1	1	167.565	21
149	man	74	1.79	100	31.21	33	28	0	10	115.94	0
150	woman	62	1.55	65	27.0552	32	0	8	8	204.26	8
151	woman	72	1.56	56	23.0112	29	10.7	7	7	167.637	7
152	man	75	1.6	68	26.5625	36	23.5	1	1	116.545	11
153	woman	69	1.5	53.4	23.7333	28.8	11.9	0	0	159.785	0
154	woman	63	1.6	55	21.4844	28	10.2	7	7	166.262	7
155	man	74	1.8	77	23.7654	31	28	0	10	125.22	0
156	woman	77	1.58	55	22.0317	27	6.9	5	5	197.539	15
157	man	69	1.7	75	25.9516	38	18	8	8	120.54	8
158	man	70	1.65	60	22.0386	31	27.7	0	10	123.667	0
159	man	68	1.7	65	22.4913	31	45	2	12	68.97	2
160	woman	70	1.56	54	22.1893	33	13.8	0	0	137.138	0
161	woman	73	1.6	78	30.4687	38	13.6	6	6	124.156	6
162	woman	66	1.58	52	20.83	33	15.7	0	0	124.267	10
163	man	74	1.65	53	19.4674	31	24	1	11	137.58	11
164	man	71	1.66	42	15.2417	26	16.5	5	15	182.095	15
165	man	71	1.73	90	30.0712	41	26.6	0	0	81.286	0
166	man	73	1.68	56	19.8413	32	10	0	10	175.58	10
167	woman	63	1.6	66	25.7812	30	10	1	1	160.72	1
168	woman	76	1.5	55	24.4444	28	3	7	7	213.31	17
169	woman	77	1.63	50	18.8189	30.5	18	7	7	129.56	27
170	man	83	1.68	79	27.9904	41	10.3	0	0	139.093	10
171	man	67	1.7	61.7	21.3495	31.4	25.9	0	10	125.513	0
172	man	79	1.65	60	22.0386	32	25	2	12	132.95	12
173	woman	66	1.57	60.3	24.4635	29	10.7	1	1	162.837	1
174	woman	60	1.65	76	27.9155	37	25.5	0	0	56.465	0
175	woman	75	1.53	46	19.6506	29	17	1	1	137.97	21
176	woman	60	1.6	52.5	20.5078	26	9.5	9	9	173.985	19
177	man	62	1.7	90	31.1419	40	18	3	3	106.92	3
178	woman	74	1.6	65	25.3906	30	8.1	6	6	179.191	6
179	woman	67	1.58	69	27.6398	35	17.4	0	0	109.854	0
180	woman	70	1.63	52	19.5717	33	11.4	3	3	149.354	13
181	man	62	1.68	78	27.6361	33.5	27.2	0	10	108.652	0
182	man	75	1.66	56.5	20.5037	32.5	14.4	6	16	160.904	26
183	man	64	1.73	87.8	29.3361	34	20.8	0	10	127.348	0
184	man	71	1.72	69	23.3234	32	22.8	1	11	134.788	1
185	man	60	1.72	78	26.3656	31	32	0	10	104.18	0
186	woman	65	1.57	50	20.2848	31	16.6	0	0	125.446	10
187	man	74	1.69	62	21.7079	33	15.8	9	19	153.638	9
188	woman	73	1.58	60	24.0346	28	23.8	4	4	105.038	4
189	woman	74	1.58	65	26.0375	32	19.4	0	0	115.114	0
190	man	67	1.68	45	15.9439	17	9.4	2	12	243.314	12
191	man	77	1.75	71.2	23.249	35	5	8	8	179.59	18
192	man	77	1.65	58	21.3039	28.5	24.8	4	14	148.568	14
193	woman	61	1.55	56	23.3091	32.5	20	0	0	100.02	0
194	man	61	1.75	54.9	17.9265	30.2	25.5	4	14	128.597	14
195	man	71	1.66	67	24.3141	37.5	19.3	0	0	120.083	0
196	woman	61	1.75	71.5	23.3469	30.2	9.4	8	8	161.518	8
197	woman	71	1.54	50	21.0828	29	16.1	0	0	139.351	0
198	woman	65	1.6	64	25	36	26.5	0	0	58.655	0
199	woman	76	1.62	55	20.9572	37.5	15.3	5	5	119.543	25
200	woman	70	1.56	60	24.6548	31	2.9	8	8	199.179	8
201	woman	78	1.58	53	21.2306	31	23	1	1	103.27	11
202	woman	85	1.5	56	24.8889	20	5	0	0	236.57	10
203	man	70	1.68	70	24.8016	34	66.4	2	12	-9.836	2
204	woman	62	1.58	67.5	27.0389	35	21.57	0	0	84.6287	0
205	man	66	1.7	82	28.3737	40	12.7	4	4	125.777	4
206	woman	73	1.56	54	22.1893	31	13.8	2	2	146.098	2
207	woman	67	1.56	50	20.5457	28.5	14.6	0	0	145.426	10
208	man	75	1.75	73	23.8367	33.8	19.4	3	13	139.422	13
209	woman	62	1.66	74	26.8544	36	17.5	0	0	102.065	0
210	man	66	1.78	70	22.0932	36	26	0	0	103.24	0
211	woman	68	1.65	55	20.202	31	12	2	2	151.26	12
212	man	68	1.65	65	23.8751	33.5	30	0	10	103.72	0
213	woman	64	1.7	62	21.4533	15	33.4	0	0	91.614	0
214	woman	67	1.55	46	19.1467	33	32.8	3	3	38.028	13
215	man	74	1.62	70	26.6728	36	18	4	4	132.92	4
216	man	74	1.7	64	22.1453	33	16.9	3	13	150.239	3
217	woman	78	1.65	65	23.8751	32	5	3	3	191.61	13
218	man	67	1.63	59	22.2063	16.2	16.2	3	13	226.014	3
219	man	74	1.7	65	22.4913	33	25.8	0	10	122.738	0
220	man	70	1.62	70	26.6728	36	27.6	0	0	100.776	0
221	man	68	1.69	66	23.1084	33	24.5	0	10	123.035	0
222	man	66	1.67	65.5	23.486	30.5	30.7	0	10	114.237	0
223	woman	70	1.6	60	23.4375	34	5.8	2	2	174.578	2
224	man	62	1.7	73	25.2595	36	23.7	1	1	107.867	1
225	woman	64	1.55	65	27.0552	35	15.8	0	0	115.598	0
226	man	61	1.7	81.5	28.2007	38	27.3	0	0	86.843	0
227	woman	67	1.64	70	26.0262	34.5	15.6	8	8	120.656	8
228	man	70	1.6	49	19.1406	34	17.7	2	12	140.647	12
229	man	65	1.64	62	23.0518	20	75.3	0	10	24.523	0
230	man	75	1.76	95	30.6689	51	26	2	2	39.22	12
231	man	68	1.74	61	20.148	34	15.4	0	10	146.514	10
232	man	72	1.65	73	26.8136	36	17.8	0	0	132.298	0
233	man	68	1.74	93	30.7174	39	25.1	1	1	93.341	1
234	woman	73	1.55	52	21.6441	30.5	19.5	2	2	118.725	2
235	woman	83	1.6	75	29.2969	35	12	8	8	150.14	18
236	man	69	1.65	69	25.3444	35	21.9	1	1	122.409	1
237	woman	67	1.58	60	24.0346	28	17	0	0	134.85	0
238	woman	66	1.6	50	19.5312	31	18	0	0	119.12	10
239	man	65	1.74	44	14.533	30	20.8	0	10	146.528	10
240	man	61	1.7	70	24.2215	36	30.8	0	0	85.308	0
241	man	67	1.78	55	17.3589	28	18.3	0	10	164.773	10
242	woman	64	1.55	58.5	24.3496	30	17	2	2	125.89	2
243	man	67	1.65	56	20.5693	31	32.5	0	10	106.975	10
244	woman	67	1.58	60	24.0346	30	14.7	7	7	139.997	7
245	man	77	1.68	73	25.8645	30	8	0	10	193.52	10
246	man	75	1.78	65	20.5151	26	13	9	19	195.39	29
247	woman	69	1.58	70	28.0404	34	10	8	8	152.4	8
248	woman	69	1.68	58	20.5499	28	9.7	5	5	173.607	15
249	man	61	1.73	70	23.3887	36	23.8	0	0	106.938	0
250	woman	68	1.6	65	25.3906	30	3.8	8	8	196.278	8
251	woman	73	1.57	75	30.4272	32	20	1	1	111.26	1
252	woman	89	1.56	60	24.6548	30	16	9	9	150.98	19
253	man	68	1.55	55	22.8928	34.3	21.3	0	0	126.891	0
254	woman	70	1.59	58	22.9421	30	13.6	4	4	147.996	4
255	man	64	1.7	67	23.1834	33	27	1	11	112.83	1
256	man	86	1.75	70	22.8571	33	18.2	1	11	153.662	11
257	woman	62	1.58	60	24.0346	32	13.3	1	1	136.563	1
258	man	61	1.7	65	22.4913	36	25	0	0	103.23	0
259	woman	62	1.62	56.5	21.5287	33	10	7	7	150.08	7
260	woman	72	1.6	66	25.7812	33	17	1	1	122.45	1
261	woman	72	1.6	41	16.0156	30	12.8	0	0	153.668	10
262	man	75	1.7	60	20.7612	30	15	5	15	170.65	25
263	woman	72	1.6	80	31.25	37	17.6	2	2	106.276	2
264	man	64	1.75	74	24.1633	33	26	0	10	115.92	0
265	man	74	1.52	55	23.8054	30	27	1	11	132.95	1
266	woman	72	1.5	59	26.2222	16	33	1	1	96.77	1
267	man	60	1.72	63	21.2953	36	27	0	0	96.43	0
268	man	65	1.76	75	24.2123	33	41.1	0	10	69.881	0
269	man	73	1.67	69	24.7409	34	21.5	0	10	130.765	0
270	man	78	1.7	76	26.2976	36	26	0	0	110.68	10
271	man	62	1.67	59	21.1553	32	24.9	0	10	122.719	0
272	man	70	1.7	70	24.2215	30	23.5	4	14	141.285	4
273	man	72	1.65	45	16.5289	26	12.4	7	17	195.384	17
274	man	69	1.68	70	24.8016	32	27.2	1	11	119.952	1
275	woman	65	1.8	89	27.4691	34	33	0	0	32.13	0
276	woman	61	1.6	78	30.4687	32	10.9	1	1	147.979	1
277	man	68	1.7	60	20.7612	31	37.6	0	10	91.836	10
278	woman	80	1.6	60	23.4375	30.5	14.8	0	0	148.248	10
279	woman	64	1.58	82	32.8473	32.85	18.9	1	1	106.871	1
280	man	72	1.8	82	25.3086	33	20	2	12	139.42	2
281	man	64	1.79	79.9	24.9368	30	22.3	0	10	141.273	0
282	woman	77	1.59	32	12.6577	15	28.8	3	3	125.428	23
283	woman	63	1.6	60	23.4375	33	6.3	8	8	169.713	8
284	man	75	1.7	65	22.4913	32.5	12	0	10	168.32	10
285	man	61	1.7	68	23.5294	37.5	28.1	0	0	86.691	0
286	man	79	1.65	65	23.8751	33.5	18.3	6	16	146.693	16
287	woman	62	1.55	66	27.4714	30	21.4	1	1	101.894	1
288	man	69	1.65	71	26.079	43	27	0	0	69.53	0
289	man	84	1.72	71	23.9995	35.5	16.2	5	5	147.002	15
290	woman	69	1.55	60	24.974	32	8	0	0	169.14	0
291	woman	71	1.4	63	32.1429	38	15.5	2	2	112.885	2
292	man	68	1.7	80	27.6817	34.5	23	0	0	120.71	0
293	woman	70	1.62	67	25.5296	33.5	20.3	0	0	102.413	0
294	man	62	1.67	63	22.5896	34	19.1	0	10	131.361	0
295	woman	62	1.6	68	26.5625	36	20.2	0	0	88.322	0
296	woman	62	1.5	42.5	18.8889	26	6	5	5	193.4	15
297	man	62	1.76	80	25.8264	35	14.9	2	2	139.699	2
298	man	69	1.73	73	24.3911	33.5	40	0	10	73.44	0
299	woman	69	1.61	68	26.2336	35	15.2	0	0	122.652	0
300	man	62	1.76	76	24.5351	33	33.8	0	10	90.578	0
301	man	61	1.7	80	27.6817	37.5	36.6	0	0	60.426	0
302	man	71	1.68	62.531	22.1553	31	23	1	11	138.81	1
303	man	75	1.7	68	23.5294	31.7	21.25	1	11	143.45	11
304	man	61	1.7	63	21.7993	35	24.4	0	0	109.724	0
305	man	74	1.7	75	25.9516	20	16	5	15	213.34	5
306	man	62	1.73	70	23.3887	35	24.2	3	3	110.962	3
307	woman	62	1.56	50	20.5457	29	11	2	2	158.11	12
308	man	68	1.68	67	23.7387	36	24.8	0	0	108.188	0
309	woman	81	1.61	78	30.0914	38	13.4	8	8	131.574	18
310	man	73	1.7	65	22.4913	32	22	8	18	138.5	8
311	man	67	1.69	80	28.0102	34	13.9	0	10	150.529	0
312	woman	62	1.66	72	26.1286	38	16	1	1	103.14	1
313	man	75	1.72	65	21.9713	28	28	5	15	139.76	15
314	woman	76	1.53	45	19.2234	25	9.3	4	4	191.083	24
315	woman	62	1.55	57	23.7253	30	17	0	0	124.29	0
316	woman	74	1.56	42.5	17.4638	30	15.1	2	2	143.561	12
317	woman	75	1.6	70	27.3437	35	16.6	0	0	120.326	10
318	man	60	1.62	52.5	20.0046	29.1	36.5	3	13	99.091	13
319	woman	80	1.65	63	23.1405	32.5	20.7	0	0	111.657	10
320	woman	66	1.6	60	23.4375	31	19.2	0	0	113.012	0
321	man	71	1.72	60	20.2812	30	6.8	8	18	193.508	18
322	man	82	1.73	70	23.3887	33	15.8	3	13	158.598	13
323	woman	71	1.6	60	23.4375	30	2	8	8	207.84	8
324	man	76	1.68	60	21.2585	29	50	4	14	67.76	14
325	woman	78	1.5	56	24.8889	35	13.9	2	2	136.469	12
326	woman	71	1.6	62	24.2187	32	18.7	1	1	116.277	1
327	woman	78	1.58	58	23.2335	30	8	0	0	182.9	10
328	man	77	1.65	71	26.079	36	19.2	0	0	131.072	10
329	man	68	1.7	63	21.7993	30.5	18.5	0	10	153.175	0
330	man	71	1.55	62	25.8065	32	15.2	7	17	158.272	7
331	woman	72	1.58	50	20.0288	34	8	1	1	164.98	11
332	woman	72	1.55	60	24.974	32	18	3	3	120.64	3
333	woman	66	1.69	70	24.5089	32	9.4	0	0	159.614	0
334	man	66	1.71	59	20.1771	32	28	0	10	115.62	10
335	woman	75	1.68	76	26.9274	33	70	0	0	-144.92	10
336	woman	65	1.66	53	19.2336	32	15	0	0	130.31	10
337	woman	65	1.5	52	23.1111	30	11.5	4	4	154.685	4
338	woman	68	1.56	55	22.6003	18	12.6	1	1	190.846	1
339	man	69	1.7	58	20.0692	32	23	0	10	132.93	10
340	man	60	1.71	72	24.623	35.5	24	0	0	108.02	0
341	man	77	1.68	65	23.03	32	17	0	10	156.43	10
342	man	67	1.64	72	26.7698	33	30	0	10	105.42	0
343	woman	79	1.57	60	24.3418	30	5	8	8	198.97	18
344	woman	67	1.55	55.5	23.1009	32.1	18.1	0	0	115.803	0
345	woman	75	1.52	55	23.8054	31.5	18.4	0	0	122.644	10
346	man	71	1.7	56	19.3772	26	4.8	7	17	218.248	17
347	woman	69	1.5	52	23.1111	14	20.3	0	0	165.573	0
348	woman	67	1.58	65	26.0375	32	18	3	3	116.64	3
349	man	62	1.79	73	22.7833	34	35	0	10	82.23	0
350	man	63	1.74	75	24.7721	45	28	0	0	53.44	0
351	woman	69	1.6	71	27.7344	20	10	0	0	198.32	0
352	woman	85	1.55	50	20.8117	29	10	4	4	181.6	24
353	woman	79	1.55	55	22.8928	31	14.3	5	5	148.353	15
354	woman	69	1.55	55	22.8928	32	19.8	0	0	109.078	0
355	man	79	1.7	78	26.9896	33.5	27.6	0	10	117.956	10
356	man	63	1.76	80	25.8264	35.5	23.7	1	1	110.807	1
357	woman	73	1.65	62	22.7732	33	18	1	1	118.16	1
358	man	76	1.45	43	20.4518	28	8.3	6	16	201.253	26
359	man	73	1.7	40	13.8408	20	10	7	17	231.26	17
360	man	60	1.65	75	27.5482	35	16.5	9	9	133.515	9
361	man	69	1.56	56	23.0112	34	28	0	10	108.2	0
362	woman	71	1.5	44	19.5556	28	14.9	0	0	148.739	10
363	woman	72	1.6	65	25.3906	33	15.9	1	1	128.049	1
364	man	71	1.7	65	22.4913	33	8.4	5	15	174.644	5
365	woman	67	1.6	55	21.4844	32	20	0	0	106.46	0
366	woman	70	1.58	56	22.4323	31	18	0	0	122.32	0
367	man	65	1.75	70	22.8571	40	28	1	1	77.88	1
368	man	71	1.6	73	28.5156	36.5	8.7	1	1	157.477	1
369	man	65	1.68	56	19.8413	31	25.6	0	10	127.056	10
370	woman	68	1.6	75	29.2969	36	17	4	4	109.41	4
371	man	71	1.74	57.5	18.9919	32	25.5	1	11	126.445	11
372	man	60	1.7	93.5	32.3529	16	50.4	1	11	116.924	1
373	man	66	1.65	60	22.0386	40	23.7	0	0	91.787	0
374	man	79	1.74	76	25.1024	33	26.4	4	14	123.984	14
375	man	73	1.65	59	21.6713	30.5	13.7	2	12	171.107	2
376	woman	65	1.7	64	22.1453	40	11	2	2	124.43	2
377	woman	62	1.65	64	23.5078	34	15.5	2	2	118.805	2
378	man	69	1.72	57	19.2672	33	15	0	10	153.01	10
379	man	71	1.68	63	22.3214	29	27.9	2	12	132.949	2
380	woman	71	1.58	50	20.0288	33	8.3	1	1	165.933	11
381	woman	72	1.6	60	23.4375	28	15.6	2	2	145.976	2
382	man	62	1.62	60	22.8624	34.5	26.1	0	0	107.411	0
383	man	72	1.72	64	21.6333	33	33.2	0	10	98.632	0
384	man	61	1.72	120	40.5625	29	30	0	10	120.26	0
385	woman	71	1.6	49	19.1406	25.8	4	4	4	211.436	14
386	woman	70	1.65	80	29.3848	35	8.7	5	5	156.537	5
387	woman	62	1.53	46	19.6506	29	17.4	0	0	125.534	10
388	woman	80	1.68	55	19.487	31.5	15.9	1	1	139.369	21
389	man	72	1.7	60	20.7612	30	28.9	0	10	125.839	10
390	man	62	1.7	54	18.6851	30.5	22.5	0	10	137.095	10
391	man	76	1.8	66	20.3704	33	25	4	14	126.45	24
392	man	72	1.7	65	22.4913	32	17.4	2	12	152.094	2
393	man	67	1.6	55	21.4844	28	26	0	10	140.98	0
394	man	84	1.7	70	24.2215	32	20	8	18	151.5	18
395	man	60	1.75	81	26.449	41	22.5	0	0	87.135	0
396	man	78	1.8	75	23.1481	31	19.3	8	18	154.583	18
397	woman	79	1.55	45	18.7305	31	13.3	1	1	153.443	21
398	man	79	1.7	70	24.2215	33	6.7	8	18	184.857	18
399	woman	86	1.55	57	23.7253	30	6.7	1	1	195.917	11
400	man	66	1.65	80	29.3848	35	27	0	0	104.79	0
401	man	90	1.73	65	21.7181	30.5	21	1	11	159.09	11
402	man	70	1.65	62	22.7732	34	27.1	0	10	111.601	0
403	woman	70	1.55	45	18.7305	20.8	8.4	8	8	204.64	18
404	man	69	1.6	120	46.875	30	30.1	0	10	120.271	0
405	man	68	1.7	65	22.4913	32	9	0	10	175.57	0
406	woman	87	1.56	45	18.4911	24	13.1	5	5	183.821	25
407	woman	72	1.61	50	19.2894	32	22.9	0	0	95.699	10
408	woman	69	1.67	57	20.4382	30.5	24.9	1	1	88.039	11
409	woman	72	1.5	51	22.6667	12	10	1	1	226.96	1
410	woman	75	1.6	51.5	20.1172	31	17.2	0	0	130.392	20
411	woman	81	1.65	65	23.8751	33	9.5	2	2	167.825	12
412	man	71	1.65	75	27.5482	35	23.5	0	0	118.705	0
413	woman	67	1.5	47	20.8889	28	16.3	4	4	138.413	14
414	woman	75	1.58	38	15.2219	28.5	14.9	0	0	150.299	20
415	woman	71	1.5	55	24.4444	34.5	23.3	0	0	84.663	0
416	man	62	1.75	85	27.7551	31.5	20	4	14	140.18	4
417	woman	82	1.65	55	20.202	34	13.7	3	3	143.967	23
418	woman	62	1.6	59	23.0469	37	17.6	0	0	98.276	0
419	man	66	1.58	63	25.2363	30	54.6	2	12	42.706	2
420	man	73	1.65	65	23.8751	34	28	1	11	110.68	1
421	woman	71	1.56	60	24.6548	20	16	1	1	169.38	1
422	man	66	1.65	70	25.7117	33	36.7	0	10	84.097	0
423	man	68	1.7	60	20.7612	33	32.4	0	10	98.624	10
424	woman	76	1.53	58	24.7768	30	17.8	0	0	131.418	10
425	man	73	1.62	64	24.3865	34	21.3	0	10	131.383	0
426	woman	69	1.55	50	20.8117	31	13	0	0	146.97	10
427	woman	62	1.5	65	28.8889	33	8.5	0	0	157.715	0
428	man	75	1.7	90	31.1419	39	26.5	0	0	93.355	10
429	woman	61	1.57	52.5	21.299	30	7.9	2	2	169.809	2
430	woman	75	1.68	75	26.5731	32	17	2	2	128.13	12
431	man	82	1.7	54	18.6851	24	17	4	14	196.65	24
432	woman	76	1.6	45	17.5781	28	7.5	7	7	190.405	27
433	man	65	1.68	77	27.2817	37	11	5	5	144.33	5
434	man	84	1.5	60	26.6667	17.5	9.5	9	19	251.225	19
435	woman	74	1.58	67	26.8386	32	19	2	2	117.15	2
436	man	66	1.8	65	20.0617	32	27	3	13	118.71	13
437	woman	65	1.55	60	24.974	32	16.5	0	0	122.675	0
438	man	71	1.66	71	25.7657	36	25.5	4	4	107.885	4
439	man	63	1.62	59	22.4813	33	25	1	11	118.39	1
440	woman	80	1.5	63	28	30	18.1	1	1	133.091	11
441	woman	78	1.69	65	22.7583	33	23	4	4	96.71	14
442	man	66	1.58	59	23.634	32	27	2	12	118.71	2
443	man	72	1.8	90	27.7778	44.3	27.9	0	0	62.577	0
444	woman	62	1.63	61	22.9591	30.5	21.3	5	5	100.763	5
445	man	86	1.75	70	22.8571	30	24.7	8	18	147.497	18
446	man	70	1.75	75	24.4898	32	25.2	0	10	126.752	0
447	woman	63	1.63	45	16.937	29	22.4	0	0	100.884	10
448	woman	84	1.5	51	22.6667	33	10.3	1	1	166.153	11
449	man	70	1.6	75	29.2969	42.5	27	0	0	72.47	0
450	woman	81	1.55	65	27.0552	33	3.4	9	9	198.874	19
451	man	73	1.65	65	23.8751	34	18.8	0	10	139.108	0
452	man	75	1.6	50	19.5312	30	13.7	3	13	174.667	23
453	man	64	1.8	65	20.0617	34	28.5	0	10	103.555	10
454	woman	79	1.5	52	23.1111	18.5	20.3	3	3	158.813	13
455	man	69	1.67	40	14.3426	25	6.2	8	18	217.322	18
456	woman	76	1.53	60	25.6312	34.5	14.4	1	1	133.964	11
457	man	66	1.76	95	30.6689	40	21	0	0	100.13	0
458	man	61	1.68	64	22.6757	30	29.3	0	10	117.783	0
459	woman	61	1.64	70	26.0262	37.5	15	2	2	109.07	2
460	woman	72	1.63	62	23.3355	33	12.6	2	2	144.846	2
461	man	79	1.72	64	21.6333	33	34.4	0	10	99.264	10
462	man	70	1.74	85	28.075	32	10.2	8	18	173.102	8
463	man	72	1.7	75	25.9516	32	34	0	10	100.8	0
464	woman	72	1.6	60	23.4375	32.5	16.2	1	1	128.162	1
465	man	64	1.65	60	22.0386	29	23.9	0	10	140.969	0
466	woman	69	1.61	60	23.1473	31	13.5	2	2	144.425	2
467	woman	72	1.62	47	17.9089	28	10.2	0	0	173.462	10
468	man	79	1.72	78	26.3656	37	22.3	0	0	118.093	10
469	man	83	1.73	70	23.3887	33	26.5	0	10	126.155	10
470	man	93	1.7	48	16.609	28	7	6	16	215.81	26
471	man	64	1.75	45	14.6939	28	18.5	0	10	162.295	10
472	man	71	1.69	49	17.1563	27	26.8	3	13	145.628	13
473	woman	73	1.6	68	26.5625	33	19.1	7	7	112.561	7
474	woman	82	1.57	60	24.3418	32	12	6	6	159.18	16
475	man	69	1.7	80	27.6817	36	20.4	9	9	122.404	9
476	woman	76	1.55	65.75	27.3673	35.5	12.1	1	1	142.391	11
477	woman	67	1.55	60	24.974	32	17.9	9	9	117.149	9
478	man	71	1.75	76	24.8163	30	30	0	10	121.82	0
479	man	68	1.62	50	19.052	30	29	0	10	123.05	10
480	woman	76	1.65	60	22.0386	30.5	6.7	4	4	186.277	14
481	man	61	1.9	87	24.0997	40	18.4	3	3	105.064	3
482	man	70	1.72	56	18.9292	33.5	22.3	0	10	128.753	10
483	man	81	1.7	63.8	22.0761	30.5	25	8	18	141.15	18
484	woman	66	1.56	53	21.7784	30	6.8	1	1	179.408	1
485	man	71	1.73	60	20.0474	33	10.3	0	10	168.773	10
486	man	74	1.7	66	22.8374	35	15.3	6	6	145.903	6
487	man	60	1.78	113	35.6647	46.5	38.8	0	0	11.248	0
488	man	70	1.73	62.5	20.8828	32.6	22.1	4	14	133.547	14
489	woman	72	1.55	45	18.7305	34	16	3	3	124.26	13
490	woman	60	1.64	65	24.1672	31.5	18	0	0	112.68	0
491	woman	69	1.6	55	21.4844	32	19.2	8	8	112.132	8
492	woman	62	1.58	54	21.6311	30	36.5	0	0	25.035	0
493	man	80	1.74	65	21.4692	33.5	27.2	1	11	119.812	11
494	woman	60	1.6	75	29.2969	32	18	8	8	111.04	8
495	woman	65	1.62	71	27.0538	33	21.8	0	0	92.418	0
496	man	67	1.68	48	17.0068	30	13.2	6	16	171.252	16
497	woman	78	1.51	55	24.1217	33	15.8	6	6	133.358	16
498	woman	76	1.6	50	19.5312	30.5	9.6	0	0	171.516	20
499	man	66	1.65	63	23.1405	30	29	0	10	121.81	0
500	woman	72	1.58	60	24.0346	29	13.1	1	1	155.421	1
501	woman	70	1.58	63.2	25.3165	38	13.8	0	0	120.738	0
502	woman	66	1.6	55	21.4844	29	21.6	0	0	107.356	0
503	man	85	1.65	75	27.5482	35.5	2.5	6	6	189.955	16
504	man	72	1.76	73.5	23.728	28	27.3	1	11	140.063	1
505	man	71	1.58	60	24.0346	38.5	23.8	0	0	101.538	0
506	man	67	1.7	81	28.0277	39	24.1	0	0	95.811	0
507	man	66	1.65	65	23.8751	33	48.5	0	10	47.635	0
508	man	74	1.6	52	20.3125	30.5	22.2	0	10	145.462	10
509	man	79	1.68	62	21.9671	30	25.4	7	17	140.994	17
510	woman	69	1.53	50	21.3593	33.5	17.4	0	0	116.374	0
511	woman	65	1.55	62	25.8065	35	21.5	3	3	87.385	3
512	woman	61	1.58	60	24.0346	32	12.1	2	2	141.871	2
513	man	66	1.7	71	24.5675	25	27	0	10	151.19	0
514	woman	63	1.55	59	24.5578	35	18	0	0	103.6	0
515	woman	70	1.7	53	18.3391	29	12.6	2	2	156.366	12
516	man	80	1.68	93	32.9507	46	22.4	2	2	76.644	12
517	woman	74	1.54	64	26.986	33	18	0	0	118.96	0
518	man	65	1.65	60	22.0386	32	22	3	13	133.54	3
519	woman	73	1.5	40	17.7778	26	10.6	1	1	178.786	11
520	woman	86	1.5	50	22.2222	25	18	0	0	154.8	10
521	woman	62	1.5	55	24.4444	36	18.3	0	0	97.993	0
522	man	70	1.72	75	25.3515	37	15	6	6	135.07	6
523	woman	62	1.6	75	29.2969	28	18	8	8	125.76	8
524	woman	61	1.49	58	26.1249	34	20.6	1	1	92.046	1
525	woman	64	1.6	43	16.7969	29	18.7	0	0	120.517	10
526	man	68	1.72	62.5	21.1263	31	17.3	4	14	154.563	4
527	man	63	1.75	70	22.8571	32	28	2	12	113.76	2
528	woman	66	1.6	70	27.3437	32	22	0	0	95.48	0
529	man	65	1.8	75	23.1481	33	27	1	11	113.45	1
530	woman	68	1.57	59	23.9361	37	16.5	1	1	108.675	1
531	woman	72	1.63	70	26.3465	30	16	1	1	137.38	1
532	man	79	1.72	72.5	24.5065	34.4	24.6	3	3	123.05	13
533	man	90	1.7	82	28.3737	38	15.3	0	0	141.903	10
534	woman	77	1.58	81	32.4467	40	4.8	7	7	165.588	17
535	man	80	1.6	75	29.2969	34	20	6	16	139.74	16
536	woman	79	1.5	74	32.8889	38	9.7	5	5	148.807	15
537	man	73	1.65	66	24.2424	30	14.4	1	11	171.264	1
538	woman	66	1.55	50	20.8117	27	11.1	0	0	167.361	10
539	woman	61	1.67	64	22.9481	36	6.8	0	0	155.728	0
540	woman	62	1.6	60	23.4375	31	17	6	6	121.01	6
541	man	66	1.7	85	29.4118	35	18	5	5	132.6	5
542	woman	63	1.62	57	21.7193	34	17.6	1	1	108.916	1
543	woman	83	1.43	49	23.9621	27	13.3	4	4	169.763	14
544	man	62	1.78	85	26.8274	43	19.7	1	1	87.747	1
545	woman	69	1.6	53	20.7031	31	16.8	0	0	127.628	10
546	woman	70	1.65	54	19.8347	30	10	0	0	166.32	10
547	woman	74	1.52	58	25.1039	34	17.1	0	0	120.261	0
548	man	73	1.7	73	25.2595	33	28	1	11	115.32	1
549	woman	79	1.55	75	31.2175	36	19.9	3	3	103.449	13
550	man	73	1.65	65	23.8751	29.5	21.2	2	12	152.572	2
551	man	82	1.72	81	27.3797	24	24	0	10	175.02	10
552	man	62	1.7	62	21.4533	34	28.5	0	10	102.315	0
553	woman	60	1.68	59.1	20.9396	33	17.9	0	0	108.269	10
554	woman	69	1.57	54	21.9076	29	17.9	1	1	128.589	1
555	woman	62	1.6	75	29.2969	34	6.6	6	6	164.106	6
556	woman	88	1.5	65	28.8889	33	8.8	1	1	176.988	11
557	man	69	1.7	50	17.301	29	30.3	0	10	124.293	10
558	woman	69	1.55	51	21.2279	31	53.1	0	0	-57.139	0
559	woman	73	1.5	46	20.4444	29	6.9	0	0	187.779	10
560	man	71	1.6	61.5	24.0234	36	23.1	1	1	115.301	1
561	man	67	1.67	65	23.3067	37	15.7	3	3	131.047	3
562	man	77	1.7	60	20.7612	32	23.5	3	13	136.345	23
563	man	65	1.76	65	20.984	33	18.2	4	14	140.642	14
564	man	60	1.7	42	14.5329	29	26.5	0	10	130.455	10
565	man	64	1.78	74	23.3556	28.5	27.3	3	13	132.783	3
566	woman	67	1.58	56	22.4323	33	12.6	7	7	140.846	7
567	man	70	1.65	65	23.8751	40	26	0	0	87.16	0
568	man	61	1.72	78	26.3656	40	23.7	1	1	88.687	1
569	man	79	1.7	60	20.7612	28	46.5	0	10	85.075	20
570	woman	65	1.57	76	30.8329	41	14.6	6	6	102.826	6
571	woman	73	1.6	52	20.3125	31	12.1	2	2	154.751	12
572	woman	77	1.6	56	21.875	33	11.7	1	1	153.427	11
573	woman	67	1.65	48	17.6309	30	15	0	0	138.47	10
574	woman	60	1.55	59	24.5578	31	18	0	0	114.32	0
575	man	75	1.58	65	26.0375	18	20	1	11	210.88	11
576	woman	64	1.58	60	24.0346	31	10.5	3	3	155.695	3
577	man	71	1.7	84	29.0657				10	353.72	0
578	woman	73	1.51	50	21.9289	29.5	20	0	0	119.46	0
579	man	79	1.82	80	24.1517	37	33.7	1	1	82.867	11
580	man	69	1.72	70	23.6614	33.4	35.4	0	10	88.118	0
581	man	84	1.7	52	17.9931	25	19.7	4	14	184.907	24
582	woman	87	1.55	60	24.974	32.5	5.2	5	5	196.152	15
583	man	68	1.73	80	26.7299	34	43.4	1	11	59.994	1
584	woman	76	1.55	60	24.974	31	8.4	6	6	175.984	16
585	woman	77	1.6	56	21.875	23	15	6	6	169.43	16
586	woman	65	1.59	70	27.6888	32	11.3	1	1	149.143	1
587	man	79	1.75	84	27.4286	38	19.2	3	3	123.032	13
588	woman	72	1.6	50	19.5312	33	19	4	4	112.27	14
589	man	60	1.7	73	25.2595	33	36	0	10	82.54	0
590	man	64	1.7	72	24.9135	40	28	0	0	77.26	0
591	woman	82	1.5	45	20	21	13.4	0	0	188.134	20
592	man	70	1.7	75	25.9516	40	27	0	0	84.07	0
593	woman	70	1.6	78	30.4687	32	15.3	3	3	132.783	3
594	man	73	1.75	77	25.1429	36	21.9	0	0	120.249	0
595	woman	62	1.68	77	27.2817	39	22.6	0	0	66.266	0
596	woman	72	1.56	45	18.4911	24.5	17	8	8	150.33	18
597	man	77	1.65	55	20.202	31	12.5	1	11	174.975	21
598	woman	74	1.63	55	20.7008	29	7.5	2	2	185.525	12
599	woman	70	1.6	57	22.2656	32	19.8	1	1	109.878	1
600	man	68	1.7	69	23.8754	35	24.8	1	1	112.828	1
601	man	61	1.74	85	28.075	40	33.5	1	1	58.405	1
602	woman	79	1.55	61	25.3902	32	11.8	4	4	157.798	14
603	man	77	1.65	75.5	27.7319	34	17.1	1	11	146.841	11
604	woman	79	1.6	60	23.4375	32	10	3	3	166.96	13
605	woman	61	1.6	69	26.9531	30	25	3	3	82.77	3
606	woman	86	1.6	63	24.6094	30.5	14.9	4	4	152.539	14
607	man	61	1.7	73	25.2595	32	27	0	10	115.61	0
608	woman	90	1.55	63	26.2227	24.5	4.2	7	7	229.882	17
609	man	76	1.7	70	24.2215	33	23.2	1	11	132.012	11
610	man	64	1.7	45	15.5709	25	17.6	3	13	178.996	13
611	woman	63	1.55	49	20.3954	27	10.7	1	1	166.997	11
612	man	76	1.76	60	19.3698	27	24	8	18	157.38	28
613	woman	61	1.51	65	28.5075	36	16.8	2	2	104.828	2
614	man	72	1.8	72	22.2222	37	24.5	1	1	106.955	1
615	man	78	1.72	65	21.9713	34	29.7	5	15	108.527	15
616	woman	67	1.55	50	20.8117	28.5	19.3	0	0	121.503	10
617	woman	71	1.58	68.5	27.4395	35	17.6	0	0	112.036	0
618	woman	77	1.58	58	23.2335	36	10.4	3	3	150.204	13
619	man	65	1.7	70	24.2215	30	18.2	3	13	154.562	3
620	man	64	1.65	65	23.8751	36	25.2	0	0	104.472	0
621	man	67	1.69	65	22.7583	36	27	0	0	100.77	0
622	woman	61	1.68	79	27.9904	35.5	13.5	1	1	123.265	1
623	man	61	1.7	59	20.4152	33	25.1	0	10	116.841	10
624	man	71	1.74	63	20.8086	33	26	0	10	120.26	10
625	man	67	1.69	66.5	23.2835	33	21.7	6	16	131.067	6
626	man	89	1.65	52.5	19.2837	29	10.1	3	13	199.111	23
627	woman	70	1.68	59	20.9042	30	17	1	1	130.69	11
628	woman	73	1.53	56	23.9224	33.5	16.8	3	3	122.628	3
629	man	67	1.72	60	20.2812	32	6.1	9	19	183.911	19
630	woman	79	1.5	65	28.8889	34	7	8	8	175.67	18
631	woman	78	1.58	65	26.0375	33	21.3	1	1	105.363	11
632	woman	68	1.4	50	25.5102	28.1	11.6	8	8	162.808	8
633	man	70	1.75	73.5	24	33.5	25	4	14	120.41	4
634	man	75	1.6	48	18.75	23.5	20	0	10	185.36	20
635	woman	62	1.57	67	27.1816	38	18.4	0	0	90.924	0
636	man	88	1.7	63.5	21.9723	30.5	25	5	15	145.49	15
637	man	90	1.68	75	26.5731	32	22	8	18	149.04	18
638	man	74	1.6	70	27.3437	35	24.8	0	0	116.548	0
639	man	75	1.55	55	22.8928	31	17.5	1	11	158.285	11
640	man	68	1.7	75	25.9516	33.5	32.8	0	10	95.068	0
641	woman	67	1.6	50	19.5312	29	22	0	0	106.12	10
642	woman	65	1.75	60	19.5918	27	14	8	8	151.8	18
643	woman	81	1.54	51.5	21.7153	29	1	10	10	224.21	20
644	woman	67	1.58	57	22.8329	32	21.9	0	0	96.789	0
645	man	74	1.72	80	27.0416	36	14.3	7	7	144.353	7
646	man	70	1.75	65	21.2245	32	15.6	0	10	156.416	0
647	woman	82	1.55	55	22.8928	28	2.5	5	5	220.655	15
648	man	68	1.61	60	23.1473	30	27	1	11	129.23	1
649	man	74	1.72	65	21.9713	33	25.2	1	11	124.592	1
650	woman	69	1.54	45	18.9745	28	11	0	0	166.99	10
651	man	66	1.73	79	26.3958	38.5	20.3	2	2	109.253	2
652	man	69	1.8	88	27.1605	30	50	0	10	58.78	0
653	man	64	1.65	45	16.5289	31	15	1	11	159.19	11
654	woman	68	1.55	57.5	23.9334	32	15	1	1	132.71	1
655	man	78	1.78	78	24.6181	45	22.4	5	5	80.044	15
656	woman	68	1.5	66	29.3333	32.5	18.1	1	1	115.291	1
657	woman	81	1.5	40	17.7778	25	5	7	7	216.97	27
658	woman	67	1.67	66	23.6652	30	6.6	5	5	181.226	5
659	man	69	1.72	62	20.9573	33	19.2	2	12	140.032	12
660	man	68	1.65	55	20.202	31	31.3	0	10	111.303	10
661	man	74	1.68	62	21.9671	29	26	6	16	140.68	6
662	man	73	1.75	74	24.1633	32	16.9	0	10	154.259	0
663	woman	67	1.58	51	20.4294	29	27	5	5	80.67	15
664	man	71	1.72	60	20.2812	33	23	0	10	129.53	10
665	man	60	1.77	65	20.7476	32	29	0	10	108.81	10
666	woman	76	1.55	67.5	28.0957	33	8.8	8	8	167.388	18
667	woman	60	1.6	61.6	24.0625	31	11.8	0	0	145.878	0
668	man	62	1.67	47	16.8525	25.5	27.5	2	12	144.845	12
669	man	67	1.75	74	24.1633	33	25	0	10	120.87	0
670	woman	61	1.65	52	19.1001	31	20	0	0	104.94	10
671	man	69	1.65	69	25.3444	34	25.5	1	11	115.925	1
672	man	68	1.65	56	20.5693	27	24.6	0	10	150.566	10
673	man	64	1.75	49	16	30	26	1	11	129.84	11
674	woman	67	1.58	77.5	31.0447	37	19.7	4	4	91.587	4
675	man	63	1.6	55	21.4844	32	22	0	10	132.3	0
676	man	73	1.68	46	16.2982	28	19	3	13	166.33	13
677	woman	61	1.62	63	24.0055	33	16	0	0	118.74	0
678	woman	72	1.65	65	23.8751	37	6.9	2	2	160.739	2
679	woman	64	1.6	75	29.2969	37.5	15.3	3	3	109.943	3
680	man	67	1.7	75	25.9516	38	25	0	0	97.67	0
681	man	65	1.75	82	26.7755	50	26	0	0	37.66	0
682	woman	69	1.58	44	17.6254	30	6	1	1	185.88	11
683	woman	69	1.67	84	30.1194	38	25	0	0	62.93	0
684	woman	75	1.55	46	19.1467	28	5.6	0	0	199.276	20
685	man	63	1.63	80	30.1103	34	81.2	1	11	-59.908	1
686	woman	60	1.63	55	20.7008	25	20	0	0	123.82	10
687	woman	60	1.55	45	18.7305	30	9.2	9	9	162.392	19
688	woman	73	1.6	82	32.0312	40	8	3	3	146.1	3
689	man	67	1.78	85	26.8274	38	26.3	0	0	93.653	0
690	man	62	1.7	65	22.4913	32	15.1	4	14	153.001	4
691	woman	66	1.6	68	26.5625	35	15.6	0	0	118.216	0
692	man	60	1.6	53	20.7031	18	21.8	0	10	196.018	10
693	man	71	1.64	64	23.7954	20	10.3	0	10	229.093	0
694	woman	68	1.65	65	23.8751	34	16.8	2	2	116.988	2
695	woman	67	1.65	75	27.5482	34	14.8	0	0	126.368	0
696	man	73	1.68	75	26.5731	36	25.6	3	3	108.816	3
697	woman	62	1.65	55	20.202	31	22	1	1	95.56	11
698	woman	69	1.55	45	18.7305	27	13.1	0	0	159.581	10
699	man	68	1.8	65	20.0617	31	37.9	1	11	90.909	11
700	woman	63	1.6	39	15.2344	26	16	3	3	143.3	13
701	man	60	1.69	69.5	24.3339	33	9.8	6	16	163.498	6
702	woman	60	1.55	70	29.1363	38	16.4	0	0	99.504	0
703	man	75	1.74	70	23.1206	20	55.7	1	11	91.287	11
704	woman	69	1.55	55	22.8928	35.5	11.7	8	8	138.827	8
705	man	80	1.7	65	22.4913	28	24	8	18	155.22	18
706	man	76	1.63	60	22.5827	31	17.1	0	10	160.141	10
707	man	67	1.67	63	22.5896	33	23	0	10	127.05	0
708	woman	71	1.58	65	26.0375	35	17.6	2	2	112.036	2
709	man	67	1.65	79	29.0174	32	28	1	11	116.24	1
710	man	70	1.68	66	23.3844	30	28	2	12	127.38	2
711	man	64	1.6	60	23.4375	33	22.2	1	11	127.662	1
712	woman	68	1.59	52	20.5688	31	7	3	3	176.71	13
713	man	68	1.75	52	16.9796	28	11.1	4	14	187.641	14
714	woman	75	1.58	55	22.0317	29	11.6	0	0	165.456	10
715	woman	73	1.6	61	23.8281	30.4	10.2	8	8	166.39	8
716	woman	61	1.6	67	26.1719	32	18	0	0	111.84	0
717	woman	73	1.58	55	22.0317	32	9.7	1	1	163.687	1
718	man	76	1.72	75	25.3515	21	5	1	11	243.93	11
719	man	70	1.65	70	25.7117	20	70	0	10	44	0
720	man	78	1.62	55	20.9572	33	18.3	0	10	148.393	20
721	man	73	1.67	62	22.231	31	26.8	3	13	128.308	3
722	man	77	1.67	78	27.968	36	20.4	3	3	127.364	13
723	woman	68	1.53	47	20.0777	30	11.7	0	0	156.067	10
724	man	70	1.7	75	25.9516	39	17.7	7	7	117.447	7
725	woman	75	1.64	60	22.3081	30	5.9	1	1	191.189	11
726	woman	68	1.5	61	27.1111	32	7.7	0	0	169.867	0
727	woman	72	1.5	68.65	30.5111	36	15.6	3	3	119.736	3
728	woman	76	1.6	76	29.6875	32	10	1	1	164.56	11
729	woman	69	1.5	52	23.1111	30	13.4	0	0	148.214	0
730	man	63	1.72	74	25.0135	28	28.8	3	13	129.848	3
731	man	74	1.72	75	25.3515	20	21.7	0	10	195.727	0
732	man	68	1.6	80	31.25	29	23.3	5	15	145.303	5
733	woman	66	1.6	58	22.6562	31.5	13.5	0	0	140.385	0
734	man	66	1.67	60	21.5139	36	23.2	0	0	111.892	0
735	woman	63	1.6	85	33.2031	34	6.8	8	8	163.888	8
736	woman	81	1.58	55	22.0317	28	6.1	2	2	201.531	12
737	man	72	1.67	62	22.231	33	15.3	1	11	153.943	1
738	man	68	1.7	47	16.263	28	16.3	2	12	171.573	12
739	man	60	1.68	58	20.5499	34	22.5	0	10	119.615	10
740	woman	79	1.55	47.5	19.7711	31	11.5	5	5	162.605	25
741	woman	81	1.57	50	20.2848	30	10	3	3	175.12	23
742	woman	74	1.56	60	24.6548	29	0	8	8	223.7	8
743	man	62	1.7	60	20.7612	33	23	0	10	123.95	10
744	man	69	1.7	80	27.6817	20	24	0	10	185.52	0
745	woman	69	1.62	46	17.5278	28	8	4	4	182.26	14
746	woman	75	1.62	71	27.0538	36	14	6	6	130.28	16
747	woman	73	1.59	51	20.1733	29	17.5	4	4	133.825	14
748	woman	61	1.67	58	20.7967	29	18.2	5	5	120.662	15
749	woman	74	1.56	74	30.4076	37	14.2	6	6	125.182	6
750	man	72	1.66	62	22.4996	31	16.7	1	11	158.897	1
751	man	67	1.7	69	23.8754	35	17.1	4	4	136.001	4
752	woman	74	1.57	55	22.3133	32	15.8	3	3	133.438	3
753	man	67	1.72	64	21.6333	36	22.9	0	0	113.439	0
754	woman	64	1.55	60	24.974	34	16.9	0	0	113.279	0
755	man	79	1.65	56	20.5693	33	27.1	0	10	121.821	20
756	man	68	1.65	60	22.0386	27.1	18.4	7	17	169.26	7
757	woman	70	1.55	70	29.1363	32	9.6	4	4	161.796	4
758	man	60	1.66	55	19.9594	33	12.6	0	10	154.846	10
759	man	71	1.66	60	21.7738	32.5	17.2	0	10	149.772	0
760	woman	72	1.62	60	22.8624	30	0	8	8	218.82	8
761	woman	78	1.53	47	20.0777	29	16.5	0	0	142.915	20
762	man	73	1.76	60	19.3698	31	19.5	2	12	150.865	12
763	woman	67	1.6	63	24.6094	30	11.7	1	1	155.267	1
764	man	61	1.75	65	21.2245	38	27.7	0	0	85.607	0
765	man	64	1.7	57	19.7232	32	22	0	10	132.92	10
766	woman	68	1.6	60	23.4375	32.5	13.4	1	1	139.214	1
767	man	79	1.6	66	25.7812	36	21.4	1	1	125.514	11
768	man	71	1.76	83	26.7949	33	73.6	0	10	-26.824	0
769	woman	69	1.67	63	22.5896	32	27	0	0	72.43	0
770	woman	65	1.64	60	22.3081	31	4.4	8	8	187.544	8
771	man	68	1.7	80	27.6817	39	24.7	0	0	94.577	0
772	woman	68	1.6	60	23.4375	34.5	11.3	5	5	143.343	5
773	woman	60	1.3	71	42.0118	28	17.3	0	0	127.723	0
774	man	70	1.74	58	19.1571	28	20	0	10	161.38	10
775	woman	61	1.6	62	24.2187	14	12.63	6	6	198.213	6
776	woman	78	1.55	42	17.4818	28	7	1	1	194.55	21
777	man	73	1.65	42	15.427	29	17	4	14	167.87	14
778	man	77	1.65	50	18.3655	26	28	0	10	150.28	20
779	man	71	1.65	55	20.202	31.5	16.9	2	12	155.339	12
780	woman	84	1.6	70	27.3437	32	10.2	6	6	169.942	16
781	woman	61	1.62	55	20.9572	28	17.1	1	1	129.541	11
782	woman	71	1.52	66	28.5665	34	15.4	0	0	126.514	0
783	woman	69	1.6	65	25.3906	40	8.6	0	0	139.846	0
784	woman	77	1.65	60	22.0386	29	9.2	1	1	179.272	11
785	man	63	1.65	50	18.3655	30	24.5	0	10	133.855	10
786	man	61	1.61	60	23.1473	32.5	32	0	10	97.84	0
787	man	63	1.72	72.5	24.5065	36	17.5	2	2	127.645	2
788	man	68	1.7	60.5	20.9343	28	19.4	2	12	161.994	12
789	man	68	1.68	66	23.3844	32	5	0	10	187.93	0
790	woman	67	1.6	52	20.3125	29	8.7	0	0	173.817	10
791	man	70	1.73	75	25.0593	33	27.5	0	10	115.005	0
792	man	60	1.7	64	22.1453	33	21	0	10	128.89	0
793	woman	67	1.5	60	26.6667	32	15	0	0	131.91	0
794	woman	76	1.55	64	26.6389	34	16.9	3	3	122.879	13
795	woman	66	1.6	70	27.3437	37	16.6	5	5	106.566	5
796	woman	61	1.58	44.1	17.6654	26.2	18.6	3	3	127.81	13
797	man	61	1.7	61	21.1073	30	10.7	2	12	175.257	2
798	man	69	1.62	54	20.5761	32	26.7	0	10	121.497	10
799	woman	74	1.58	58	23.2335	30	17.3	2	2	132.363	2
800	woman	80	1.65	60	22.0386	30.5	5	7	7	198.13	17
801	woman	70	1.65	70	25.7117	39	13	1	1	121.53	1
802	woman	60	1.6	60	23.4375	32	15.2	0	0	125.292	0
803	woman	85	1.56	70	28.764	32	14.1	6	6	150.891	16
804	woman	71	1.55	60	24.974	32	17.8	0	0	120.858	0
805	man	69	1.67	60	21.5139	32	34	0	10	98.94	0
806	woman	86	1.6	55	21.4844	33	16	7	7	138.74	17
807	man	65	1.71	80	27.3588	34	32	0	10	93.36	0
808	man	70	1.68	72	25.5102	32	25.8	0	10	124.898	0
809	man	66	1.83	84	25.0829	35	7.1	2	2	166.281	2
810	man	76	1.7	73	25.2595	31	23	1	11	141.91	11
811	man	62	1.73	86	28.7347	40	19.1	0	0	103.521	0
812	woman	70	1.55	54	22.4766	35	17.5	0	0	111.745	0
813	woman	72	1.62	65	24.7676	33	18	4	4	117.36	4
814	man	63	1.65	74	27.1809	34.5	21.1	0	0	123.481	0
815	woman	67	1.5	62	27.5556	15	31.7	4	4	102.667	4
816	man	71	1.6	60	23.4375	31	17.8	0	10	154.878	0
817	woman	84	1.5	50	22.2222	30	4	2	2	208.06	12
818	man	71	1.6	65	25.3906	34	28.7	1	11	107.277	1
819	man	68	1.71	62	21.2031	30	18.4	1	11	155.804	1
820	woman	62	1.59	60	23.7332	29	30	1	1	61.4	1
821	man	78	1.65	60	22.0386	32	28	0	10	123.06	10
822	woman	62	1.55	64	26.6389	36	11.6	6	6	132.096	6
823	man	71	1.75	60	19.5918	30	26	2	12	134.18	12
824	man	71	1.7	65	22.4913	19	20	1	11	203.76	1
825	woman	79	1.55	41	17.0656	28	18	0	0	139.36	20
826	woman	66	1.55	7	2.91363	33	7.8	0	0	164.478	10
827	woman	60	1.58	61	24.4352	15	18	2	2	166.8	2
828	woman	74	1.63	54	20.3244	32.5	11.7	5	5	152.667	15
829	man	67	1.72	72	24.3375	34	61.7	0	10	2.827	0
830	woman	90	1.7	45	15.5709	29	6.6	5	5	202.906	25
831	man	85	1.7	60	20.7612	29.5	20	8	18	163.72	28
832	man	80	1.75	57	18.6122	29	15.9	4	14	175.609	24
833	woman	73	1.58	56	22.4323	30	16	1	1	138.18	1
834	man	64	1.66	63	22.8625	33	31	0	10	100.47	0
835	man	63	1.78	60	18.937	33	27.7	0	10	110.047	10
836	woman	87	1.55	80	33.2986	29	7.8	5	5	194.398	15
837	woman	61	1.67	75	26.8923	35	20.3	0	0	90.293	0
838	woman	61	1.6	52	20.3125	30.5	16.9	0	0	122.359	10
839	woman	63	1.6	55	21.4844	31	28.6	0	0	62.766	0
840	man	77	1.7	48	16.609	27	26.9	0	10	149.039	20
841	woman	65	1.73	75	25.0593	37	3.7	8	8	171.427	8
842	man	68	1.68	75	26.5731	35.1	20.5	4	4	125.651	4
843	woman	69	1.59	60	23.7332	32	15.3	2	2	131.983	2
844	woman	60	1.76	74	23.8895	33	30	0	0	46.68	0
845	woman	68	1.6	53	20.7031	31	48.7	0	0	-35.543	10
846	woman	68	1.5	55	24.4444	37.5	16.9	0	0	104.999	0
847	man	72	1.7	76	26.2976	32	2	5	15	199.68	5
848	woman	73	1.49	55.5	24.9989	31.5	16.8	1	1	129.188	1
849	woman	73	1.6	70	27.3437	33.5	8	3	3	167.42	3
850	woman	72	1.62	75	28.578	30	0	9	9	218.82	9
851	man	73	1.7	54	18.6851	31	12.8	0	10	171.568	10
852	woman	82	1.56	45	18.4911	32	15.4	1	1	141.874	21
853	woman	77	1.6	44	17.1875	26	22.9	1	1	119.379	21
854	man	68	1.72	70	23.6614	32	28	1	11	116.86	1
855	man	63	1.71	55	18.8092	30	27	1	11	126.13	11
856	woman	60	1.65	64	23.5078	32	17	8	8	116.13	8
857	woman	60	1.6	62	24.2187	32	24	0	0	80.5	0
858	man	92	1.73	53	17.7086	29	13.8	3	13	189.538	23
859	man	69	1.65	45	16.5289	27	18	8	18	171.58	18
860	woman	68	1.6	65	25.3906	28	10.3	0	0	169.753	0
861	woman	70	1.61	58	22.3757	31.5	18	0	0	120.68	0
862	woman	86	1.55	61	25.3902	29	10	4	4	182.4	14
863	woman	67	1.5	50	22.2222	29.5	18.3	0	0	123.313	0
864	man	65	1.7	71	24.5675	27.7	36.5	0	10	108.687	0
865	woman	62	1.55	48	19.9792	26.5	18.1	1	1	130.171	11
866	man	72	1.78	75	23.6713	40	28	0	0	82.22	0
867	man	73	1.7	76	26.2976	34	25.4	0	10	118.714	0
868	man	65	1.62	75	28.578	35	19.2	2	2	128.272	2
869	man	82	1.75	70	22.8571	33	15.7	7	17	158.907	17
870	man	74	1.75	76	24.8163	38	26.5	0	0	97.375	0
871	man	62	1.76	69	22.2753	31.52	26.2	1	11	120.929	1
872	man	68	1.71	72.9	24.9307	29.8	12.6	1	11	174.654	1
873	man	67	1.74	64	21.1389	32	25	1	11	125.51	1
874	man	84	1.72	60	20.2812	30	21	0	10	157.69	20
875	man	60	1.7	75	25.9516	33	15	8	18	147.43	8
876	woman	69	1.58	60.5	24.2349	32	24.2	0	0	86.682	0
877	woman	64	1.6	57	22.2656	32	19.5	0	0	106.605	0
878	man	70	1.6	60	23.4375	32	15.5	0	10	156.725	0
879	man	70	1.7	70	24.2215	32	36	0	10	93.38	0
880	man	75	1.7	59	20.4152	33	8.7	5	15	176.197	25
881	woman	68	1.5	48	21.3333	30.5	13.4	0	0	145.774	0
882	woman	63	1.65	68	24.977	37	12.5	2	2	125.035	2
883	woman	65	1.55	57	23.7253	31	14.2	3	3	137.662	3
884	woman	89	1.5	45	20	15	12	4	4	220.54	24
885	woman	71	1.6	70	27.3437	32	23.4	1	1	92.354	1
886	man	77	1.66	63.5	23.044	30	32.6	7	17	117.506	17
887	man	61	1.72	60	20.2812	32	28.3	0	10	111.593	10
888	man	63	1.72	76	25.6896	38	22.9	2	2	101.679	2
889	man	77	1.73	75	25.0593	33	7.8	6	16	180.218	16
890	man	74	1.8	75	23.1481	33.5	27.6	6	16	114.856	6
891	man	72	1.67	60	21.5139	30	24	0	10	140.98	0
892	woman	72	1.57	47	19.0677	30.5	14.4	0	0	143.884	10
893	woman	60	1.5	39	17.3333	29	11.9	3	3	151.929	13
894	man	80	1.7	54	18.6851	32	20	3	13	149.02	23
895	woman	77	1.65	83.9	30.8173	39	15.8	0	0	112.878	10
896	woman	68	1.58	65	26.0375	33	26.5	1	1	70.895	1
897	woman	75	1.65	55	20.202	27	15.3	1	1	153.183	21
898	man	78	1.7	55	19.0311	31	28.4	0	10	126.464	20
899	woman	68	1.67	65	23.3067	32	10.3	6	6	156.633	6
900	man	86	1.66	53	19.2336	34	18.8	5	15	147.168	25
901	man	69	1.8	88	27.1605	39	31.9	0	0	72.949	0
902	man	72	1.8	70	21.6049	33	34	0	10	96.16	0
903	man	65	1.7	69.8	24.1522	33.8	29.8	0	10	101.086	0
904	woman	83	1.59	46.7	18.4724	26.5	5.6	8	8	210.596	28
905	man	79	1.69	80	28.0102	40	25.5	8	8	94.285	18
906	man	79	1.55	52	21.6441	31	16	0	10	165.4	10
907	woman	66	1.59	90	35.5999	40	17.5	0	0	92.145	0
908	woman	62	1.59	55	21.7555	28	15	0	0	141.03	0
909	man	69	1.73	72	24.0569	38	20.9	1	1	111.579	1
910	man	64	1.69	55	19.257	30	19	0	10	151.47	10
911	woman	61	1.6	60.4	23.5937	27.2	20.9	0	0	112.823	0
912	man	69	1.67	66	23.6652	33.5	25	0	10	119.79	0
913	man	76	1.6	52	20.3125	27.5	23.5	5	15	156.605	25
914	man	65	1.78	75	23.6713	23	30.5	0	10	149.035	0
915	man	82	1.78	64	20.1995	30	45	2	12	82.29	22
916	man	70	1.69	71	24.8591	31	34.9	0	10	101.419	0
917	man	70	1.67	65	23.3067	32	28	0	10	118.1	0
918	woman	79	1.58	60	24.0346	34	10	8	8	160.4	18
919	man	74	1.75	74	24.1633	35	20	2	2	131.38	2
920	woman	70	1.55	50	20.8117	30	14.3	0	0	144.433	10
921	man	79	1.67	65	23.3067	31.5	16	9	19	163.08	19
922	man	79	1.72	62	20.9573	33	20.2	4	14	143.142	24
923	woman	68	1.5	49	21.7778	29	9.1	1	1	172.581	1
924	woman	61	1.6	52	20.3125	29	17.8	1	1	122.698	11
925	man	63	1.65	60	22.0386	33	17.1	0	10	142.801	0
926	woman	61	1.62	120	45.7247	33	14.9	0	0	124.339	0
927	man	60	1.68	55	19.487	28	18.3	0	10	160.433	10
928	man	70	1.65	60	22.0386	39	24.1	3	3	97.671	3
929	woman	61	1.68	59	20.9042	32	22.7	2	2	87.917	12
930	woman	79	1.52	50	21.6413	29	10	5	5	176.8	15
931	woman	68	1.63	56	21.0772	33	16.3	1	1	122.813	1
932	woman	64	1.65	58	21.3039	35	12.7	3	3	131.377	3
933	man	63	1.6	62	24.2187	33	30.1	1	11	102.631	1
934	man	61	1.8	65	20.0617	29	0	9	19	212.96	19
935	woman	77	1.6	50	19.5312	21	18	0	0	160.72	20
936	woman	65	1.61	42	16.2031	24	16	1	1	151.46	11
937	man	60	1.85	78	22.7904	32	28	0	10	111.9	0
938	woman	77	1.55	65	27.0552	32	17	2	2	129.73	12
939	man	67	1.7	72	24.9135	25	23.4	1	11	162.934	1
940	woman	70	1.5	54	24	33	12.9	1	1	141.719	1
941	man	68	1.74	62	20.4783	27	26	4	14	146.24	14
942	man	76	1.6	60	23.4375	33	26.6	0	10	121.506	10
943	woman	72	1.58	60	24.0346	30	15	9	9	142.47	9
944	man	76	1.65	60	22.0386	32	20	1	11	146.54	11
945	woman	68	1.52	49	21.2084	27	8.7	1	1	181.177	1
946	man	79	1.73	60	20.0474	30.5	9	7	17	189.35	27
947	man	65	1.78	65.5	20.6729	31	32.5	1	11	105.735	11
948	woman	76	1.6	66	25.7812	31.8	10.8		0	161.144	10
949	woman	71	1.55	52.4	21.8106	28.2	10.8	4	4	168.952	4
950	woman	72	1.5	63	28	37	10.8	1	1	140.888	1
951	man	69	1.68	58	20.5499	33	24.3		10	124.273	10
952	man	74	1.65	55	20.202	30	18	2	12	160.76	12
953	woman	71	1.6	56.6	22.1094	31.4	14.7	0	0	138.605	0
954	woman	71	1.6	65	25.3906	36	12.9	6	6	132.679	6
955	man	68	1.7	56.4	19.5156	26.7	26.3	1	11	146.705	11
956	woman	78	1.58	59.5	23.8343	25.5	15.5	9	9	159.485	19
957	man	69	1.71	63.3	21.6477	30.4	24.9	1	11	134.483	1
958	woman	62	1.59	55	21.7555	29	21	0	0	107.21	0
959	man	73	1.7	70	24.2215	33	24.5	0	10	126.135	0
960	woman	68	1.6	43	16.7969	31	16	0	0	130.9	10
961	woman	73	1.55	63	26.2227	28	17.8	0	0	135.578	0
962	man	77	1.7	77	26.6436	38	19.7	1	1	120.247	11
963	man	72	1.65	65	23.8751	33	18	5	15	145.6	5
964	man	63	1.62	70	26.6728	31	30	1	11	112.22	1
965	woman	65	1.65	60.5	22.2222	36	16.1	0	0	111.591	0
966	woman	90	1.6	45	17.5781	28	6.8	8	8	205.168	28
967	man	69	1.75	64	20.898	29	21.9	1	11	150.249	11
968	man	74	1.74	71.5	23.6161	29.4	26.5	0	10	137.279	0
969	woman	62	1.6	55	21.4844	32	41.6	0	0	-7.484	0
970	man	68	1.6	55	21.4844	33	14.8	6	16	153.008	6
971	man	60	1.78	68	21.4619	28	61.5	0	10	26.945	0
972	woman	68	1.5	90	40	36.5	10.6	2	2	140.346	2
973	woman	68	1.58	45	18.026	32	15	0	0	132.71	10
974	man	60	1.69	62	21.7079	31	31	1	11	107.27	1
975	man	79	1.65	61.5	22.5895	25.5	17.1	4	14	187.521	14
976	woman	69	1.52	61	26.4024	34	14.7	3	3	128.477	3
977	woman	62	1.57	57	23.1247	30	8	3	3	170.1	3
978	woman	61	1.58	63	25.2363	30	19.5	0	0	110.765	0
979	woman	72	1.56	54	22.1893	30	40	0	0	15.22	0
980	man	67	1.75	80	26.1224	33	28	1	11	111.6	1
981	woman	62	1.58	50	20.0288	29	17	0	0	127.57	10
982	man	68	1.73	55	18.3768	29.7	12.7	3	13	174.809	13
983	woman	72	1.6	62	24.2187	20	21	0	0	144.73	0
984	man	62	1.7	55	19.0311	31	10.5	5	15	171.855	15
985	man	74	1.58	70	28.0404	32.5	16.6	1	11	153.486	1
986	man	65	1.73	76	25.3934	37	22.9	0	0	107.559	0
987	woman	65	1.58	70	28.0404	35	17.5	1	1	107.745	1
988	man	81	1.75	65	21.2245	30.5	65.9	0	10	14.769	10
989	woman	69	1.65	76	27.9155	35	17	2	2	113.49	2
990	man	79	1.68	45	15.9439	30	10.8	8	18	186.108	28
991	woman	93	1.58	60	24.0346	30	2.8	5	5	221.368	15
992	woman	73	1.6	55	21.4844	30	13.3	0	0	151.923	0
993	woman	61	1.68	60	21.2585	31	26	0	0	74.4	0
994	woman	66	1.48	55	25.1096	35.5	9.1	1	1	149.661	1
995	man	69	1.7	80	27.6817	33	35	3	13	91.21	3
996	man	72	1.7	62	21.4533	32	14	4	14	162.6	4
997	man	80	1.7	53	18.3391	29	21.2	0	10	159.232	20
998	man	67	1.73	140	46.7774	32	5	3	13	187.31	3
999	woman	71	1.5	49	21.7778	30.5	10.8	2	2	161.408	2
1000	man	77	1.75	65	21.2245	32	25.5	3	13	130.165	13
1001	man	77	1.75	65	21.2245	32	25.5	3	13	130.165	13
1002	man	69	1.8	70	21.6049	31	25	0	10	131.39	0
1003	woman	61	1.6	65	25.3906	29	22.4	0	0	99.284	0
1004	man	70	1.6	45	17.5781	29	18	2	12	162.92	12
1005	woman	61	1.56	55	22.6003	29	4.3	7	7	191.413	7
1006	woman	67	1.53	60	25.6312	31	15.2	3	3	134.172	3
1007	man	66	1.65	65	23.8751	32	27	0	10	118.71	0
1008	man	60	1.75	55	17.9592	31	26.3	6	16	121.793	16
1009	woman	70	1.6	52.5	20.5078	32	17.9	0	0	119.549	10
1010	man	88	1.6	75	29.2969	31	17.4	1	11	166.654	11
1011	woman	64	1.54	55	23.1911	32	16.2	0	0	123.402	0
1012	man	74	1.6	60	23.4375	30	25	1	11	139.13	1
1013	man	67	1.61	50	19.2894	26	17.4	1	11	176.834	11
1014	woman	66	1.65	55	20.202	28	22.5	0	0	106.055	10
1015	man	74	1.64	75	27.8852	35.5	18.9	3	3	132.459	3
1016	woman	67	1.6	62	24.2187	32	17.8	1	1	117.658	1
1017	man	74	1.57	51	20.6905	30	21.8	2	12	149.018	12
1018	woman	81	1.5	63.2	28.0889	35	16	5	5	128.18	15
1019	man	65	1.74	85	28.075	36	21.5	4	4	116.525	4
1020	woman	74	1.55	56	23.3091	31	16.1	0	0	135.191	0
1021	man	72	1.74	85	28.075	34	24.1	0	10	122.111	0
1022	man	70	1.62	47	17.9089	27	26.9	0	10	144.699	10
1023	man	71	1.75	80	26.1224	37	20.1	4	4	119.931	4
1024	woman	71	1.6	60	23.4375	32	10	4	4	160.56	4
1025	man	65	1.72	65	21.9713	34	18	0	10	136.62	0
1026	woman	66	1.5	58	25.7778	32	10.7	3	3	152.997	3
1027	woman	79	1.62	56	21.3382	32	20	0	0	116.06	10
1028	woman	70	1.58	60	24.0346	30.8	25.1	2	2	86.837	2
1029	man	72	1.78	70	22.0932	33	29.3	0	10	110.683	0
1030	man	68	1.7	62	21.4533	34	3	9	19	184.83	9
1031	man	65	1.7	45	15.5709	25.5	6	8	18	213.14	18
1032	woman	74	1.55	50	20.8117	26	5.8	8	8	204.018	18
1033	man	78	1.6	53	20.7031	29	17.5	0	10	169.425	20
1034	man	74	1.65	82	30.1194	36	22.7	0	0	118.397	0
1035	man	67	1.65	61.5	22.5895	32.5	23.8	0	10	126.898	0
1036	woman	61	1.58	56	22.4323	31	37.2	0	0	17.392	0
1037	woman	71	1.62	62	23.6244	32.5	16.7	1	1	124.817	1
1038	man	65	1.62	45	17.1468	28	6.1	7	17	201.231	17
1039	man	66	1.75	75	24.4898	32	28	1	11	115.62	1
1040	man	76	1.7	61.3	21.2111	33	20.5	0	10	140.355	10
1041	man	77	1.74	75	24.7721	33	22	3	13	136.34	13
1042	man	72	1.7	58	20.0692	35	16	1	1	142.5	11
1043	woman	72	1.58	61	24.4352	30	8.6	7	7	175.046	7
1044	woman	62	1.6	46	17.9687	27	17.6	3	3	131.076	13
1045	man	70	1.64	51	18.9619	32	23.8	0	10	131.078	10
1046	man	77	1.7	65	22.4913	30.5	23.3	4	14	143.923	14
1047	man	68	1.7	70	24.2215	30	8.6	9	19	186.086	9
1048	woman	80	1.56	52	21.3675	33	12.6	0	0	151.246	10
1049	woman	67	1.58	60	24.0346	30	8	8	8	174.1	8
1050	man	75	1.74	51	16.845	31	21	8	18	147.47	28
1051	woman	69	1.55	67	27.8876	34	16	3	3	121.86	3
1052	woman	77	1.6	71	27.7344	32	34	0	0	43.2	10
1053	man	73	1.71	60	20.5191	32	20	0	10	144.68	10
1054	man	66	1.65	70	25.7117	31	8.7	9	19	179.897	9
1055	man	72	1.7	50.7	17.5433	27.5	14.4	0	10	182.244	10
1056	man	70	1.65	49	17.9982	27	24.6	4	14	151.806	14
1057	woman	74	1.62	75	28.578	37	9.9	0	0	147.069	0
1058	woman	70	1.55	60	24.974	31	11	1	1	157.95	1
1059	woman	68	1.57	68	27.5873	35	18	5	5	107.6	5
1060	man	63	1.72	64	21.6333	33	30.8	0	10	100.468	0
1061	man	74	1.65	53	19.4674	29.5	24.5	1	11	142.995	11
1062	woman	72	1.68	78	27.6361	34	14	0	0	134.44	0
1063	man	62	1.7	85	29.4118	36	25.7	0	0	101.687	0
1064	woman	71	1.63	54	20.3244	31.5	22.3	0	0	99.593	10
1065	woman	65	1.66	80	29.0318	37	14.9	2	2	114.419	2
1066	woman	66	1.58	56	22.4323	32.5	15.7	1	1	125.907	1
1067	man	75	1.67	55	19.721	30	20	0	10	155.2	20
1068	man	76	1.58	66	26.4381	38	9.8	5	5	150.218	15
1069	woman	62	1.65	75	27.5482	33	25	1	1	73.73	1
1070	man	77	1.63	65	24.4646	31	22.3	0	10	144.693	10
1071	man	69	1.73	94	31.4077	34	35	4	14	86.57	4
1072	man	80	1.65	75	27.5482	31	24.6	5	15	139.446	15
1073	man	62	1.7	50	17.301	28	4.7	8	18	203.697	18
1074	man	76	1.58	65	26.0375	22	5	2	12	239.29	12
1075	woman	68	1.45	51	24.2568	33	14.4	0	0	132.484	0
1076	man	65	1.65	45	16.5289	25	20.9	0	10	169.419	10
1077	man	75	1.67	65	23.3067	35	21.9	1	1	126.129	11
1078	woman	62	1.5	50	22.2222	29	18.7	1	1	118.917	1
1079	man	68	1.76	77	24.858	36.8	20.9	0	0	116.527	0
1080	man	77	1.73	60	20.0474	32	24.8	0	10	132.328	20
1081	woman	74	1.58	62	24.8358	31	15.2	2	2	139.772	2
1082	man	66	1.6	60	23.4375	24.5	12	2	12	199.86	2
1083	man	60	1.76	80	25.8264	34	28	1	11	102.62	1
1084	woman	71	1.6	60	23.4375	33	10.9	9	9	152.699	9
1085	woman	79	1.61	51	19.6752	22	24.2	0	0	127.482	20
1086	man	66	1.7	61	21.1073	31.4	14.9	4	14	158.883	4
1087	woman	74	1.52	59	25.5367	31	17.7	0	0	127.047	0
1088	woman	77	1.7	80	27.6817	20	18	8	8	164	18
1089	man	70	1.7	70	24.2215	37	18.5	3	3	124.255	3
1090	man	69	1.58	50.5	20.2291	31	23.1	0	10	137.261	10
1091	man	81	1.68	82	29.0533	42	27.5	0	0	80.065	10
1092	woman	73	1.7	75	25.9516	32	13.2	4	4	145.872	4
1093	man	76	1.62	56	21.3382	35	24.5	0	0	118.715	10
1094	man	68	1.7	57	19.7232	30	28	2	12	126.14	12
1095	woman	69	1.62	69	26.2917	31	15	1	1	136.79	1
1096	man	75	1.68	65	23.03	34	18.2	0	10	142.202	10
1097	woman	62	1.56	59	24.2439	33	8.3	4	4	158.733	4
1098	man	71	1.7	72	24.9135	24	24	0	10	168.2	0
1099	man	74	1.7	50	17.301	31	26	1	11	131.4	11
1100	man	66	1.67	61	21.8724	27	18	5	15	169.72	5
1101	woman	74	1.64	65	24.1672	29	25.5	0	0	93.905	0
1102	man	63	1.69	70	24.5089	33	13.3	0	10	154.543	0
1103	woman	61	1.65	80	29.3848	31	1.5	8	8	199.105	8
1104	man	71	1.65	45	16.5289	26	19.1	1	11	174.061	11
1105	woman	66	1.6	50	19.5312	31.5	9.5	6	6	160.745	16
1106	woman	79	1.7	75	25.9516	37	15.8	0	0	121.038	10
1107	woman	65	1.56	38	15.6147	15.61	28	0	0	117.899	10
1108	man	63	1.75	67.5	22.0408	31	14.4	0	10	160.424	0
1109	man	65	1.75	66	21.551	31	21.5	5	15	139.725	5
1110	man	77	1.72	70	23.6614	30.5	26.4	2	12	134.344	12
1111	woman	72	1.6	68.3	26.6797	33.5	20.2	4	4	104.522	4
1112	man	74	1.6	75	29.2969	38	25	0	0	102.01	0
1113	woman	63	1.58	48	19.2277	28	17	1	1	131.65	11
1114	man	71	1.71	73	24.9649	32	28	1	11	118.72	1
1115	woman	75	1.6	70	27.3437	32	14	4	4	143.4	14
1116	man	71	1.73	70	23.3887	33.5	20.9	0	10	133.699	0
1117	man	97	1.75	65	21.2245	27.5	6.5	4	14	222.155	14
1118	man	62	1.68	75	26.5731	36	21.8	0	0	113.738	0
1119	man	60	1.7	59	20.4152	30	21	0	10	142.81	10
1120	man	61	1.77	67	21.3859	36	16.2	1	1	130.422	1
1121	man	80	1.65	54	19.8347	32	11.9	0	10	174.049	20
1122	man	64	1.82	63	19.0194	33	24.4	1	11	120.864	11
1123	woman	75	1.55	45	18.7305	26.5	12.1	0	0	171.111	20
1124	woman	84	1.6	61	23.8281	30	3	9	9	213.15	19
1125	woman	71	1.6	61	23.8281	33	10.3	3	3	155.753	3
1126	woman	82	1.6	58	22.6562	32	14	0	0	149	10
1127	woman	63	1.65	50	18.3655	29	10	0	0	164	10
1128	woman	69	1.58	49	19.6283	31	5.7	5	5	184.127	15
1129	woman	68	1.5	50	22.2222	31	15.2	0	0	134.972	0
1130	man	68	1.65	65	23.8751	32	27	0	10	119.95	0
1131	woman	87	1.64	120	44.6163	28	2.5	8	8	224.655	18
1132	woman	77	1.56	68	27.9421	33	19.6	0	0	113.216	10
1133	man	61	1.55	49.5	20.6035	32	28	1	11	112.52	11
1134	man	77	1.6	55	21.4844	31	25	0	10	136.35	10
1135	woman	69	1.55	50	20.8117	30	10.1	0	0	165.011	10
1136	woman	67	1.58	64	25.6369	32	10.4	6	6	155.324	6
1137	man	70	1.62	55	20.9572	29	26.2	4	14	137.582	14
1138	man	80	1.6	50	19.5312	29.5	22.8	1	11	151.968	21
1139	man	78	1.6	50	19.5312	19	20	0	10	208.1	20
1140	man	61	1.7	75	25.9516	34	22.5	0	10	120.235	0
1141	man	62	1.63	61.5	23.1473	44.5	26.8	0	0	58.848	0
1142	man	71	1.72	62	20.9573	29	12.5	1	11	180.535	11
1143	woman	64	1.55	65	27.0552	33	18	1	1	110.96	1
1144	woman	68	1.5	67	29.7778	33	11.5	0	0	147.245	0
1145	woman	64	1.63	85	31.9922	33	17	0	0	116.05	0
1146	man	89	1.72	66	22.3094	20	5	7	17	256.63	17
1147	woman	69	1.55	54	22.4766	36	12.3	1	1	134.133	1
1148	man	69	1.8	83	25.6173	46	27	3	3	55.61	3
1149	woman	71	1.5	55	24.4444	30.6	14.3	2	2	143.265	2
1150	woman	69	1.68	77	27.2817	35.4	26.7	1	1	62.805	1
1151	man	74	1.8	80	24.6914	34	20	0	10	136.02	0
1152	man	73	1.65	64	23.5078	18	19.9	2	12	209.949	2
1153	man	61	1.73	65	21.7181	33	28.7	0	10	105.717	0
1154	man	63	1.73	75	25.0593	34	35.2	0	10	82.232	0
1155	man	69	1.69	82	28.7105	34	47.8	0	10	47.018	0
1156	woman	63	1.6	45	17.5781	26	6	7	7	194.2	17
1157	man	66	1.7	82	28.3737	39	27	4	4	86.23	4
1158	woman	61	1.58	60	24.0346	20	5	4	4	217.37	4
1159	man	80	1.6	70	27.3437	35	22	5	5	128.92	15
1160	woman	83	1.58	50	20.0288	29.5	8.8	6	6	184.468	26
1161	woman	62	1.45	42	19.9762	26	9	8	8	178.13	18
1162	man	67	1.72	69	23.3234	34	27.5	0	10	108.505	0
1163	woman	68	1.58	59	23.634	38	9.2	0	0	142.552	0
1164	woman	61	1.58	68	27.2392	35	13.8	1	1	123.378	1
1165	man	62	1.6	56	21.875	33	40	0	10	71.42	0
1166	woman	72	1.58	52	20.83	33	16.9	1	1	122.959	11
1167	man	70	1.68	66	23.3844	36	23.6	2	2	113.136	2
1168	woman	76	1.51	58	25.4375	31	23	0	0	101.67	10
1169	woman	70	1.6	55	21.4844	30	4	1	1	196.86	1
1170	man	68	1.72	79	26.7036	33	28	1	11	112.22	1
1171	woman	68	1.59	75	29.6665	37	8	8	8	151.94	8
1172	woman	72	1.62	78	29.7211	37	8.4	3	3	153.104	3
1173	man	67	1.7	62.5	21.6263	29	18	3	13	161.06	3
1174	man	67	1.67	62	22.231	33	24.6	0	10	122.106	0
1175	man	67	1.7	69	23.8754	33	32	0	10	99.24	0
1176	man	75	1.45	45	21.4031	29.5	14.6	2	12	174.206	12
1177	woman	78	1.6	44.5	17.3828	31	16.4	4	4	136.864	24
1178	woman	73	1.55	67.45	28.0749	35	10.2	4	4	151.302	4
1179	woman	61	1.55	71	29.5525	38	14.9	1	1	107.939	1
1180	man	71	1.65	66	24.2424	29.5	8.4	0	10	190.884	0
1181	woman	71	1.58	60	24.0346	37	16.8	0	0	109.548	0
1182	woman	88	1.5	70	31.1111	33	9.1	7	7	175.461	17
1183	man	70	1.75	65	21.2245	31	10.1	2	12	178.051	2
1184	man	61	1.66	63	22.8625	33	21.5	0	10	127.965	0
1185	man	69	1.65	65	23.8751	35	23.9	2	2	116.229	2
1186	man	73	1.7	80	27.6817	33	19.2	5	15	142.512	5
1187	man	64	1.72	77.5	26.1966	37	12.9	6	6	137.839	6
1188	man	70	1.65	46	16.8962	31	10	2	12	178.36	12
1189	man	70	1.66	67	24.3141	34	27.5	0	10	110.365	0
1190	woman	62	1.63	76.5	28.793	36	12.8	0	0	125.988	0
1191	man	61	1.65	64.2	23.5813	35.5	26.4	0	0	101.224	0
1192	man	61	1.7	61	21.1073	35	25.6	0	0	106.016	0
1193	man	74	1.7	75	25.9516	35	28	2	2	106.66	2
1194	man	68	1.7	56	19.3772	27	10.6	3	13	193.826	13
1195	woman	69	1.53	54	23.0681	34	17.2	0	0	115.752	0
1196	woman	81	1.52	46	19.91	31	15	4	4	146.39	24
1197	man	76	1.75	70	22.8571	29	0	9	19	222.26	19
1198	man	72	1.69	49	17.1563	27.5	20.5	8	18	163.395	18
1199	man	65	1.72	72	24.3375	38	26.5	0	0	91.795	0
1200	man	78	1.68	63	22.3214	33	17.5	0	10	150.865	10
1201	man	67	1.66	59.5	21.5924	31	26	1	11	127.06	1
1202	man	85	1.71	68	23.255	37	23.2	6	6	119.032	16
1203	man	73	1.63	65	24.4646	30	27	2	12	132.33	2
1204	man	66	1.58	70	28.0404	33	32.2	0	10	98.002	0
1205	woman	71	1.53	45	19.2234	29	10	0	0	170.4	10
1206	woman	61	1.65	65	23.8751	32.5	26.1	1	1	68.971	1
1207	man	73	1.7	80	27.6817	31	25	0	10	133.87	0
1208	man	71	1.71	75	25.6489	33	36.7	0	10	87.197	0
1209	woman	70	1.68	75	26.5731	30	19.1	0	0	120.001	0
1210	woman	62	1.58	60	24.0346	37	2.3	6	6	176.153	6
1211	man	84	1.62	60	22.8624	34	10	2	12	173.12	12
1212	man	70	1.75	67	21.8776	33	21.4	0	10	133.854	0
1213	man	68	1.67	65	23.3067	32	22	0	10	135.4	0
1214	man	71	1.7	65	22.4913	36	34	0	0	81.62	0
1215	woman	68	1.56	68	27.9421	35	17	2	2	112.69	2
1216	woman	65	1.6	51.5	20.1172	31.5	17.8	0	0	117.698	10
1217	man	70	1.7	60	20.7612	33	27	1	11	116.55	11
1218	woman	72	1.6	58	22.6562	29	5.9	6	6	192.069	6
1219	woman	90	1.6	60	23.4375	30	9.7	2	2	183.847	12
1220	man	76	1.78	74	23.3556	38	25.3	5	5	102.323	15
1221	woman	63	1.6	65	25.3906	28	18	2	2	126.56	2
1222	woman	91	1.54	60	25.2994	30	7.6	8	8	195.336	18
1223	man	79	1.67	60	21.5139	29.5	5.8	7	17	203.878	17
1224	man	63	1.73	71.5	23.8899	37	22	0	0	109.1	0
1225	man	60	1.7	70	24.2215	32	32.5	0	10	97.995	0
1226	man	61	1.77	70	22.3435	35.5	27.5	0	0	97.825	0
1227	woman	67	1.5	61	27.1111	32	22	0	0	96.28	0
1228	man	77	1.68	67.5	23.9158	32	10.8	0	10	175.588	10
1229	man	62	1.73	73	24.3911	38	25.7	0	0	92.407	0
1230	man	73	1.73	65	21.7181	30	10	1	11	184.86	1
1231	woman	62	1.6	55	21.4844	36	14.3	0	0	118.353	0
1232	woman	69	1.61	57	21.9899	32	17.1	3	3	122.821	3
1233	woman	74	1.4	44	22.449	32	20.5	0	0	109.515	0
